# Supplementary material for: β-arrestin1 and 2 exhibit distinct phosphorylation-dependent conformations when coupling to the same GPCR in living cells
Source: PubMed Central journal article supplement (PMC9512828; doi:10.1038/s41467-022-33307-8), 2022-09-26
Supplement: 41467_2022_33307_MOESM1_ESM.pdf [file 41467_2022_33307_MOESM1_ESM.pdf]

# **$\beta$ -arrestin1 and 2 exhibit distinct phosphorylation-dependent conformations when coupling to the same GPCR in living cells**

**Raphael S. Haider\*, Edda S. F. Matthees\*, Julia Drube, Mona Reichel, Ulrike Zabel, Asuka Inoue, Andy Chevigné, Cornelius Krasel, Xavier Deupi, Carsten Hoffmann**

\* Authors contributed equally

To whom correspondence should be addressed: [carsten.hoffmann@med.uni-jena.de](mailto:carsten.hoffmann@med.uni-jena.de)

## **Supplementary Information**

### **This .pdf includes:**

Supplementary Figures 1-11

Supplementary Tables 1-5

Supplementary References

# Supplementary Figure 1

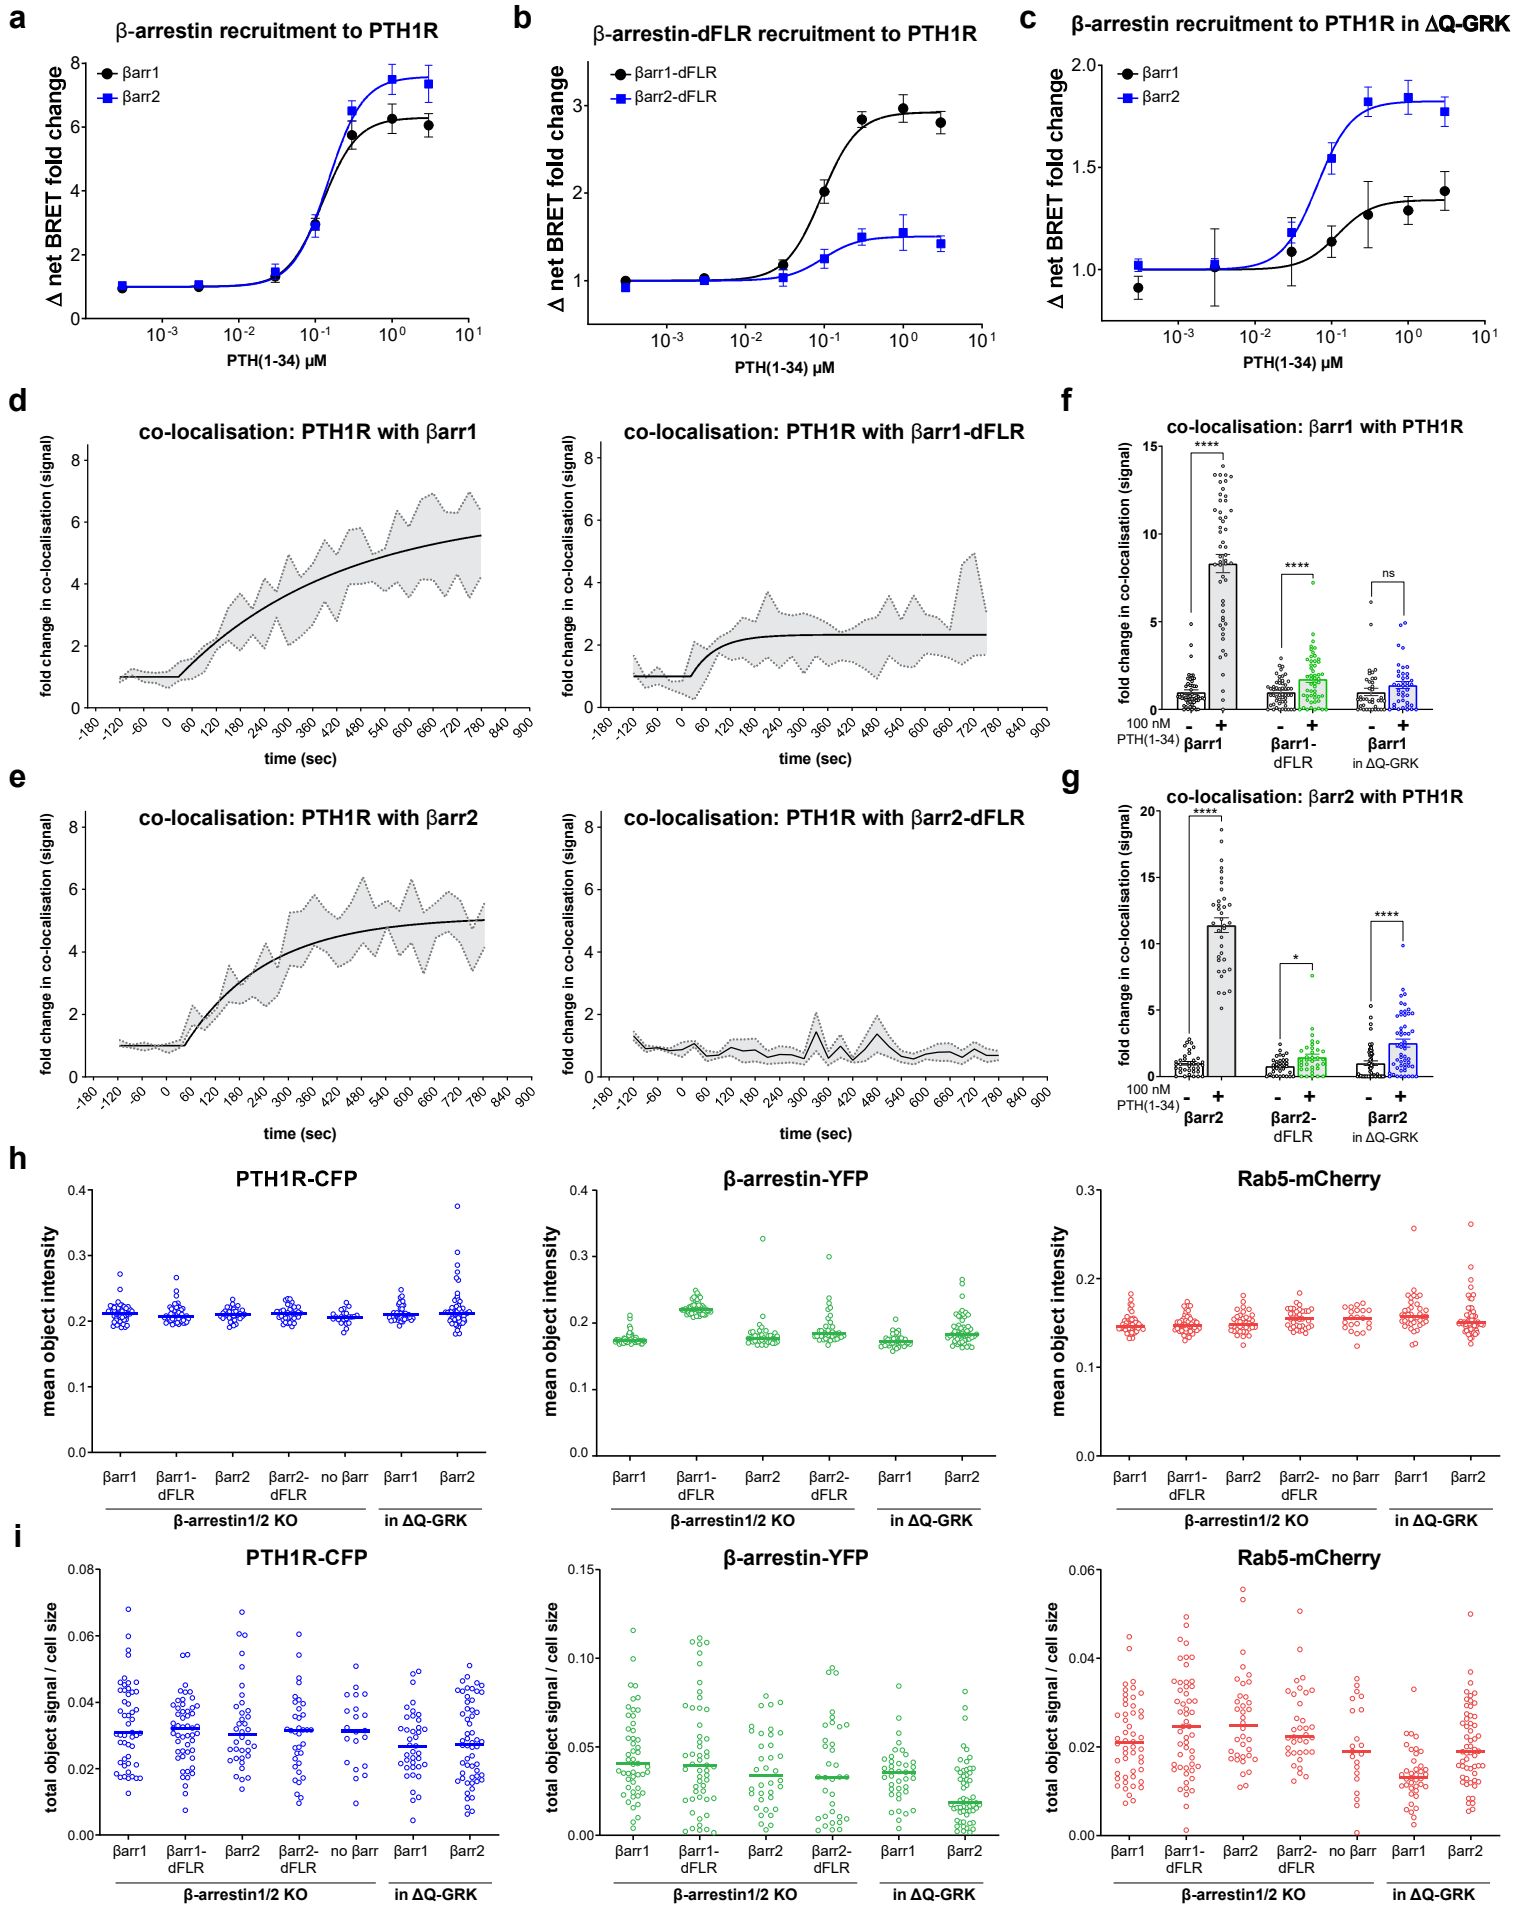

**Supplementary Figure 1:** a-c Concentration response curves of NanoBRET  $\beta$ -arrestin1 and 2 recruitment to the PTH1R with  $\beta$ -arrestin-WT and -dFLR constructs and in  $\Delta$ Q-GRK cells from Figure 1b are shown again, sorted into the different conditions and with appropriate axis limits to enable a detailed comparison. d, e Live-cell confocal microscopy of  $\beta$ -arrestin1/2 double knockout cells transfected with PTH1R-CFP, the early endosome marker Rab5-mCherry and  $\beta$ -arrestin1-YFP WT or dFLR constructs (d) or  $\beta$ -arrestin2-YFP WT or dFLR constructs (e). Four representative movies of stimulation with 100 nM PTH(1-34) for 15 minutes were used for the quantification of co-localisation between PTH1R-CFP and the respective  $\beta$ -arrestin1 and 2-YFP constructs over time using Squassh and SquasshAnalyst, represented as mean fold change in co-localisation signal  $\pm$  SEM. f, g Analogous quantification calculated using Squassh and SquasshAnalyst (number of images per respective condition;  $\beta$ arr1 (39),  $\beta$ arr1-dFLR (43),  $\beta$ arr2 (33),  $\beta$ arr2-dFLR (27)), represented as mean fold change in co-localisation signal + SEM, of paired images, acquired before and after stimulation with 100 nM PTH(1-34) for 15 minutes. Representative images are shown in Figure 1c, e. The statistical significance between paired images, acquired before and after stimulation was calculated by two-sided paired t test (\*,  $p < 0.05$ ; \*\*,  $p < 0.01$ ; \*\*\*,  $p < 0.001$ ; \*\*\*\*,  $p < 0.0001$ ) with exact p-values as follows:  $\beta$ arr1 and  $\beta$ arr1-dFLR  $p < 0.0001$ ,  $\beta$ arr1 in  $\Delta$ Q-GRK  $p = 0.1791$ ,  $\beta$ arr2 and  $\beta$ arr2 in  $\Delta$ Q-GRK  $p < 0.0001$ ,  $\beta$ arr2-dFLR  $p = 0.0134$ . h and i show specific segmentation parameters (mean object intensity (h) and total object signal per cell size (i)) for all basal images (number of images per condition;  $\beta$ arr1 (39),  $\beta$ arr1-dFLR (43), no  $\beta$ arr (17),  $\beta$ arr1 in  $\Delta$ Q-GRK (38),  $\beta$ arr2 (33),  $\beta$ arr2-dFLR (27),  $\beta$ arr2 in  $\Delta$ Q-GRK (50)) that were subjected to further image analysis.

Source data is provided as a source data file.

# Supplementary Figure 2

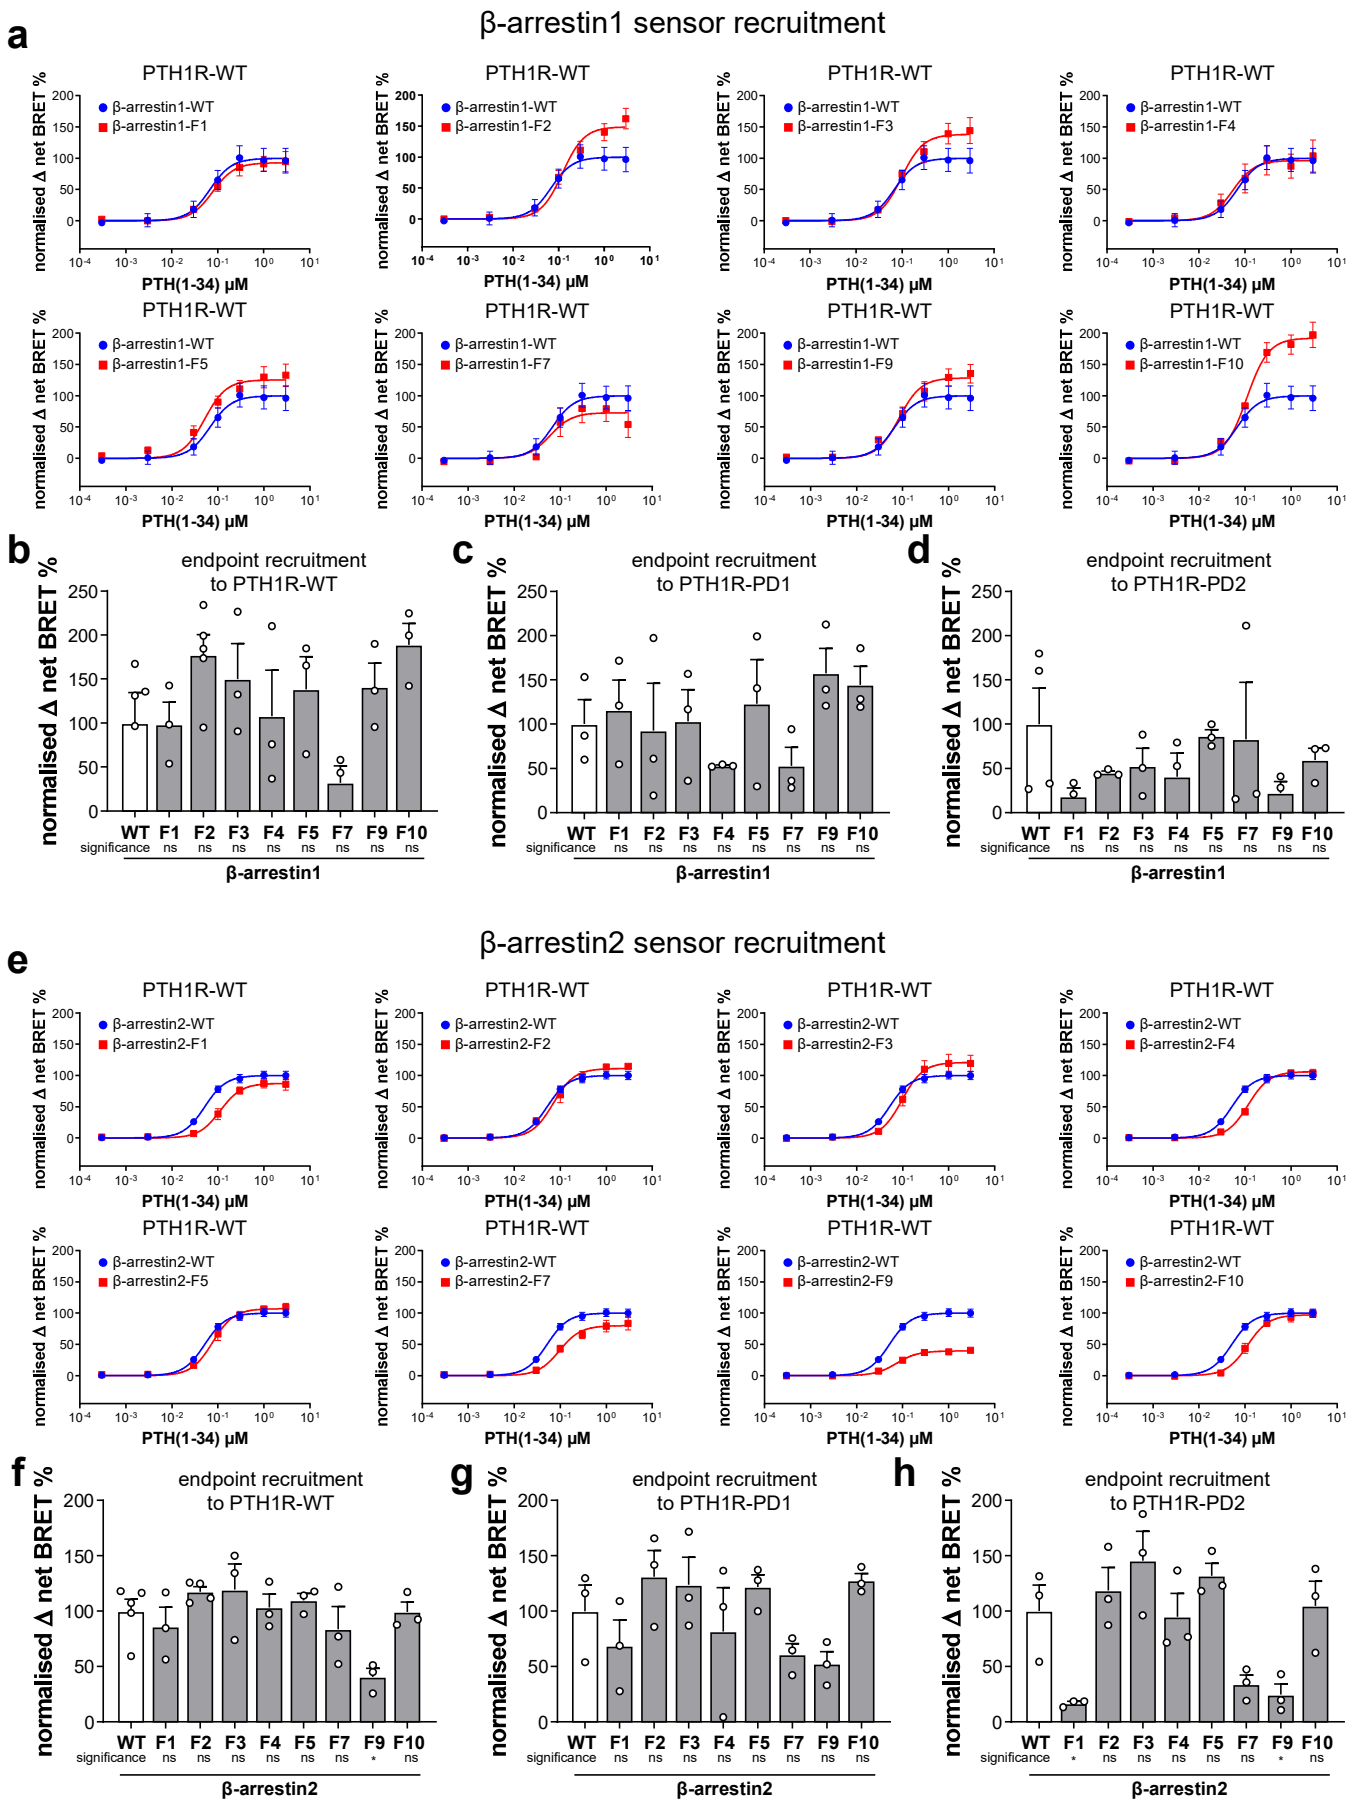

**Supplementary Figure 2:** Assessment of  $\beta$ -arrestin1 (a-d) and 2 (e-h) biosensor (F1, F2, F3, F4, F5, F7, F9 and F10) recruitment to the PTH1R-WT (a, b and e, f) and two phosphorylation-deficient receptor mutants, PTH1R-PD1 (c and g) and PTH1R-PD2 (d and h) via intermolecular NanoBRET and upon stimulation with PTH(1-34). Concentration-dependent recruitment is shown for the conditions featuring the PTH1R-WT, with data recorded for the  $\beta$ -arrestin-WT constructs shown multiple times to ensure comparability. Additionally, the BRET changes recorded at saturating ligand concentrations are depicted as bar charts for all three receptor variants, normalised to the respective  $\beta$ -arrestin-WT recruitment (b-d and f-h). Data are shown as  $\Delta$  net BRET change in per cent, mean of at least three independent repetitions ( $\beta$ -arrestin1-WT + PTH1R-WT, and -PD2 n=4,  $\beta$ -arrestin1-F2 + PTH1R-WT n=5,  $\beta$ -arrestin2-WT + PTH1R-WT n=5,  $\beta$ -arrestin2-F2 + PTH1R-WT n=4, all other conditions n=3, note that some data points lie outside of axis limits)  $\pm$  SEM. The statistical significance in comparison to the respective  $\beta$ -arrestin-WT was calculated by one-way ANOVA, followed by a one-sided Dunnett's test (\*, p<0.05; \*\*, p<0.01; \*\*\*, p<0.001; \*\*\*\*, p<0.0001). Exact p-values for conditions with significant differences in comparison to the respective  $\beta$ -arrestin-WT are:  $\beta$ -arrestin2-F9 + PTH1R-WT p=0.0189,  $\beta$ -arrestin2-F1 + PTH1R-PD2 p=0.0253,  $\beta$ -arrestin2-F9 + PTH1R-PD2 p=0.0471, differences for all other conditions have been found to be non significant (ns).

Source data is provided as a source data file.

# Supplementary Figure 3

**a**

**$\beta$ -arrestin1 conformational changes for the interaction with PTH1R-WT, -PD1, -PD2**

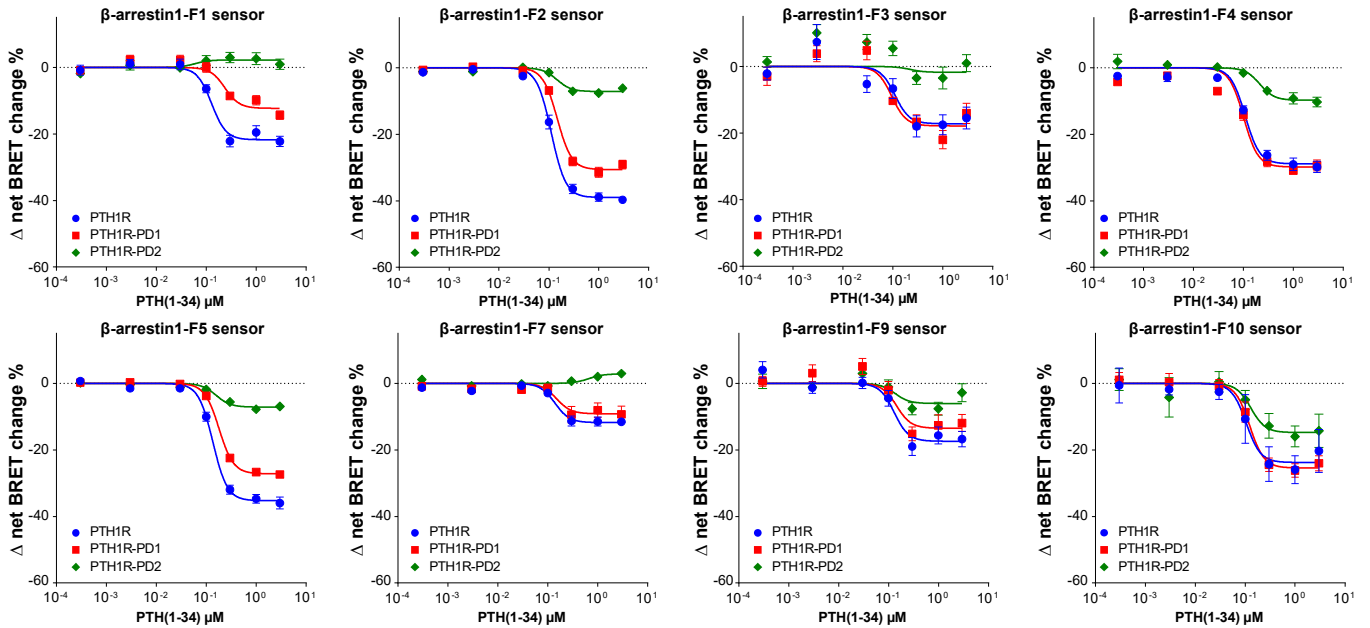

**b**

**$\beta$ -arrestin2 conformational changes for the interaction with PTH1R-WT, -PD1, -PD2**

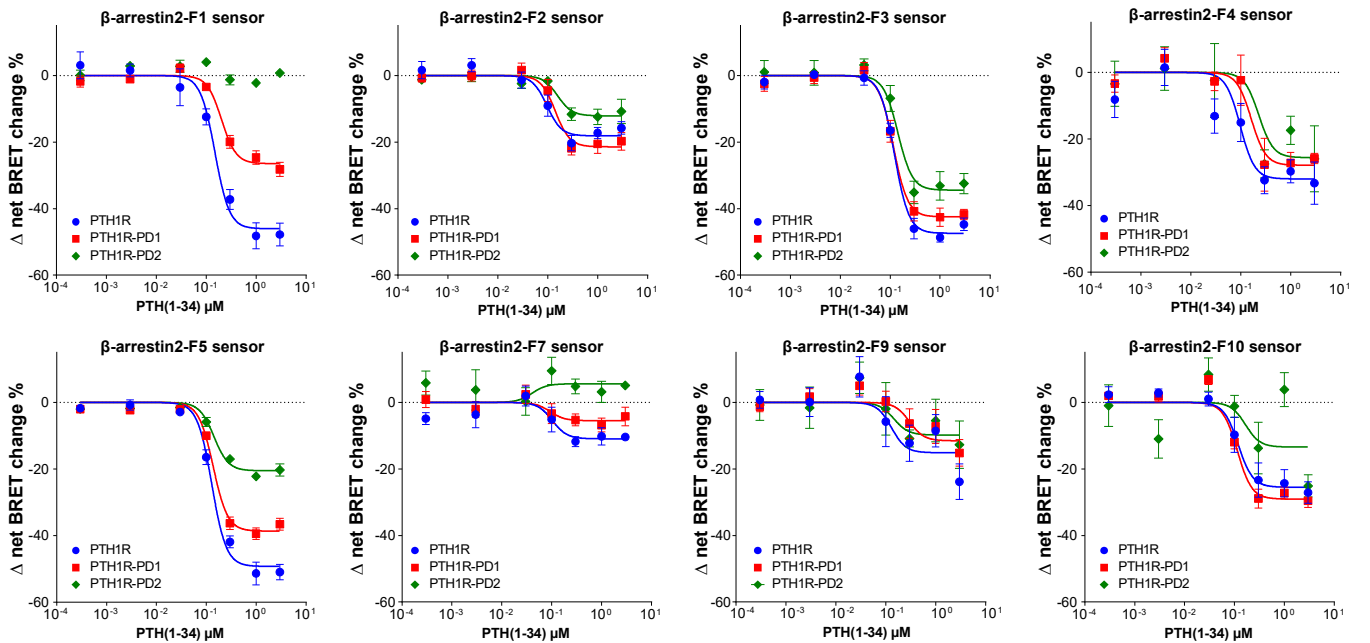

**Supplementary Figure 3:** Data shown corresponds to bar graphs depicted in Figure 3 and 5. Concentration dependent conformational change data for  $\beta$ -arrestin1 (a) and 2 (b) biosensors interacting with untagged PTH1R-WT, -PD1, PD2 variants after FIAsh-labelling and stimulation with PTH(1-34). Data are shown as  $\Delta$  net BRET change in per cent, mean of three independent repetitions ( $n=3$ )  $\pm$  SEM. Source data is provided as a source data file.

# Supplementary Figure 4

**a**

## $\beta$ -arrestin1 conformational changes for the interaction with PTH1R-WT in $\Delta$ Q-GRK

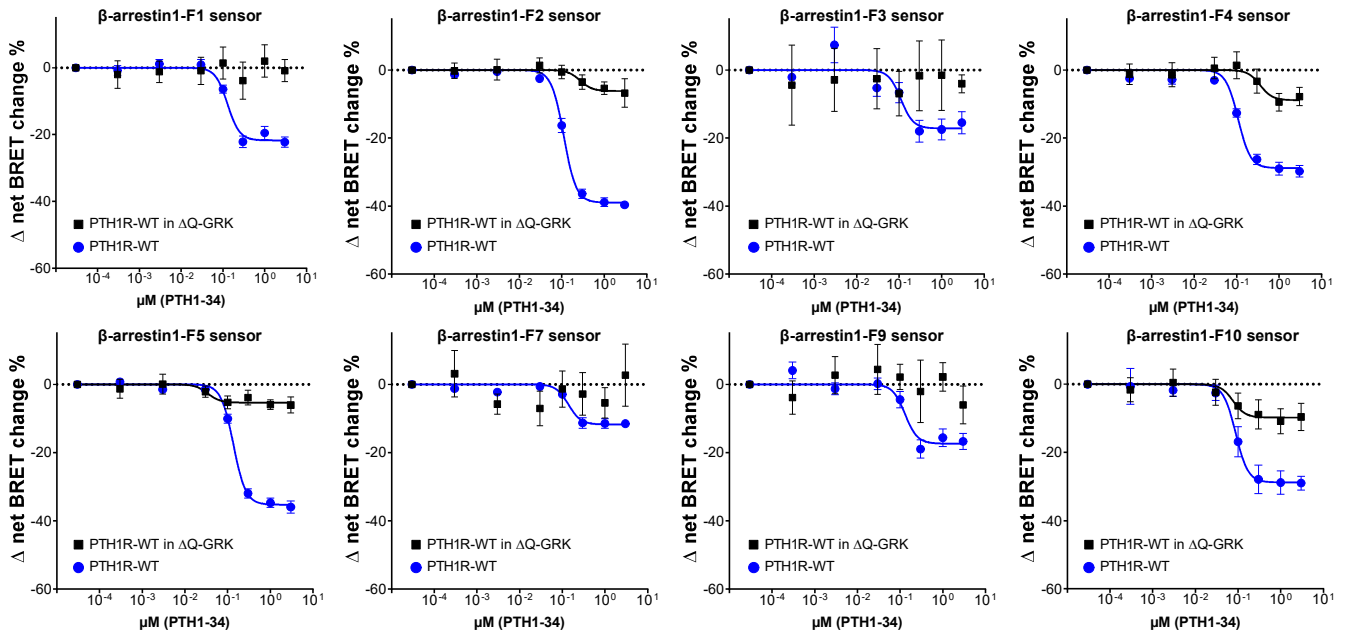

**b**

## $\beta$ -arrestin2 conformational changes for the interaction with PTH1R-WT in $\Delta$ Q-GRK

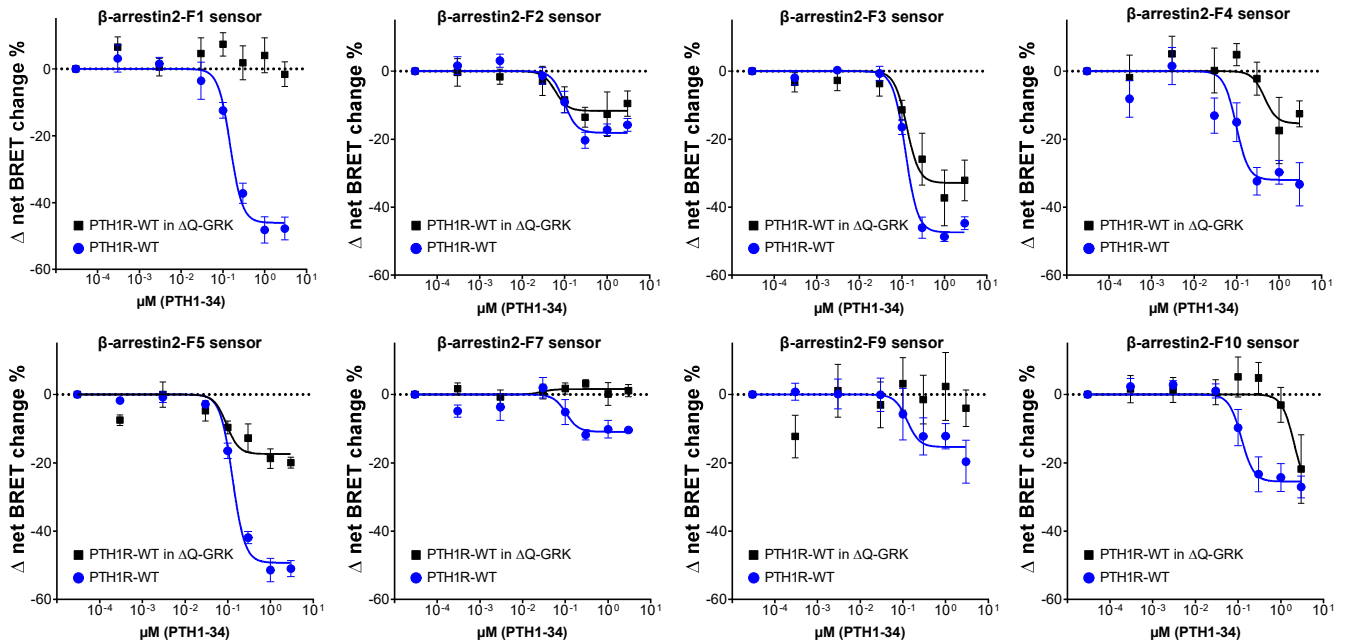

**Supplementary Figure 4:** Data shown corresponds to bar graphs depicted in Figure 5. Concentration-dependent conformational change data for  $\beta$ -arrestin1 (a) and 2 (b) biosensors interacting with untagged PTH1R-WT in the absence of GRKs using  $\Delta$ Q-GRK cells after FIAsh-labelling and stimulation with PTH(1-34). PTH1R-WT curves recorded in HEK-WT (Supplementary Figure 3) are depicted again to ensure comparability. Data are shown as  $\Delta$  net BRET change in per cent, mean of at least three independent repetitions (measurements in HEK-WT  $n=3$ , measurements in  $\Delta$ Q-GRK  $n=4$ )  $\pm$  SEM. Source data is provided as a source data file.

# Supplementary Figure 5

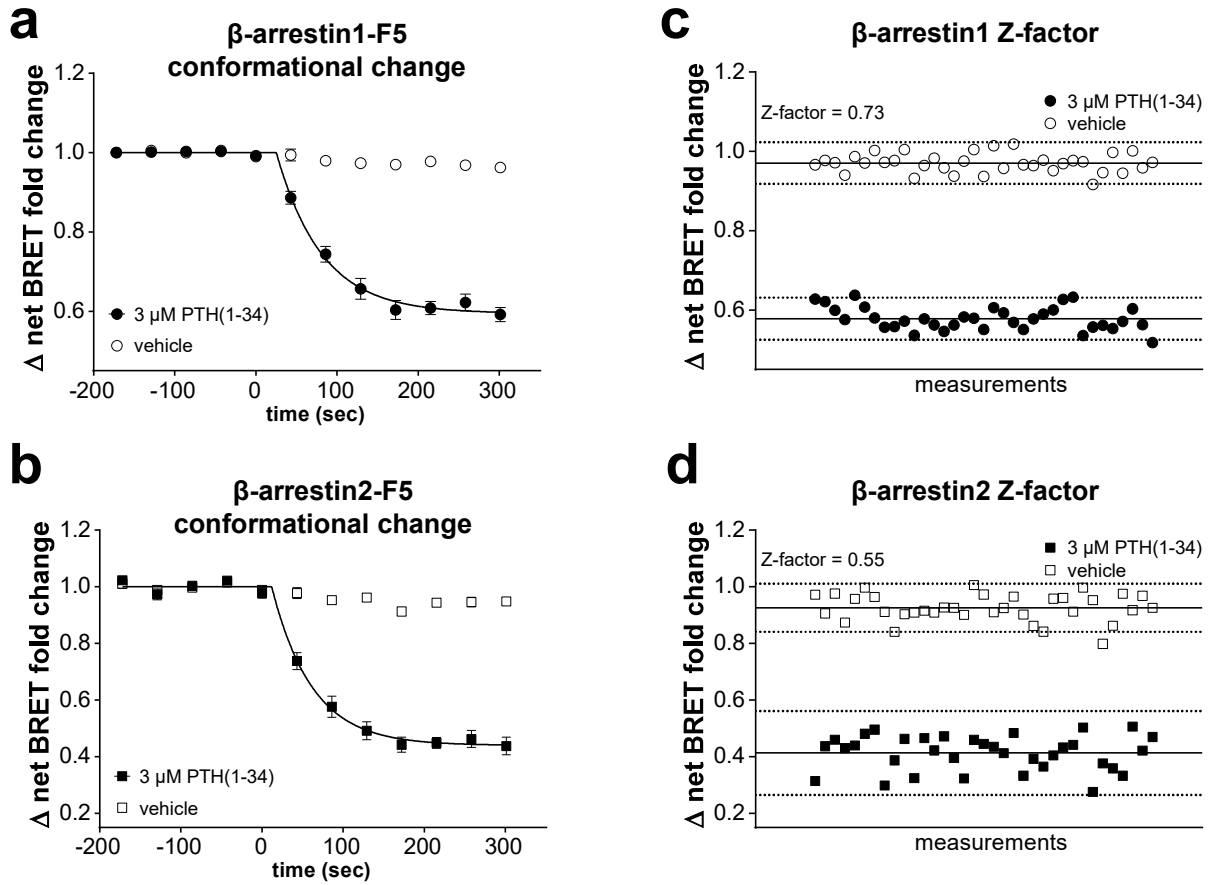

**Supplementary Figure 5:** a and b show the time-dependent conformational change of  $\beta$ -arrestin1/2-F5 upon coupling to the PTH1R-WT induced by application of 3  $\mu$ M PTH(1-34) or vehicle at second zero. Data are shown as  $\Delta$  net BRET change in per cent, mean of three independent repetitions ( $n=3$ , three wells per independent transfection)  $\pm$  SEM. To assess the inherent Z-factor of the applied assay, data points for  $\beta$ -arrestin1 and 2 recorded after reaching the plateau signal are plotted individually in c and d, respectively. Additionally, lines indicating the mean and three times the standard deviation are depicted to evaluate the separation band between vehicle and 3  $\mu$ M PTH(1-34)-stimulated samples. The calculated Z-factors resulting from those measurements are depicted accordingly. Source data is provided as a source data file.



## Supplementary Figure 6

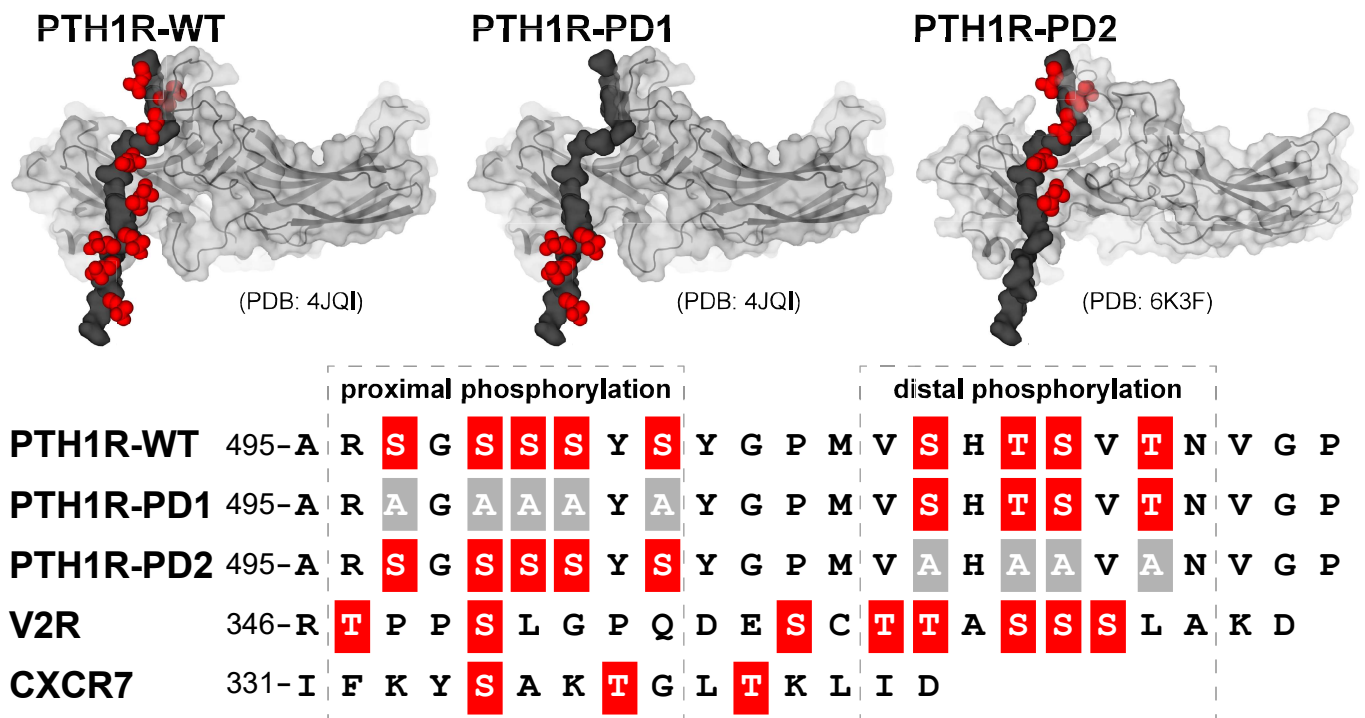

**Supplementary Figure 6:** Mechanistic model of  $\beta$ -arrestin interactions with PTH1R-WT, -PD1 and -PD2, utilising crystal structures of complexes with the V2pp (PDB: 4JQI)<sup>1</sup> and the CXCR7pp (PDB: 6K3F)<sup>2</sup> as well as a C-terminal alignment.

# Supplementary Figure 7

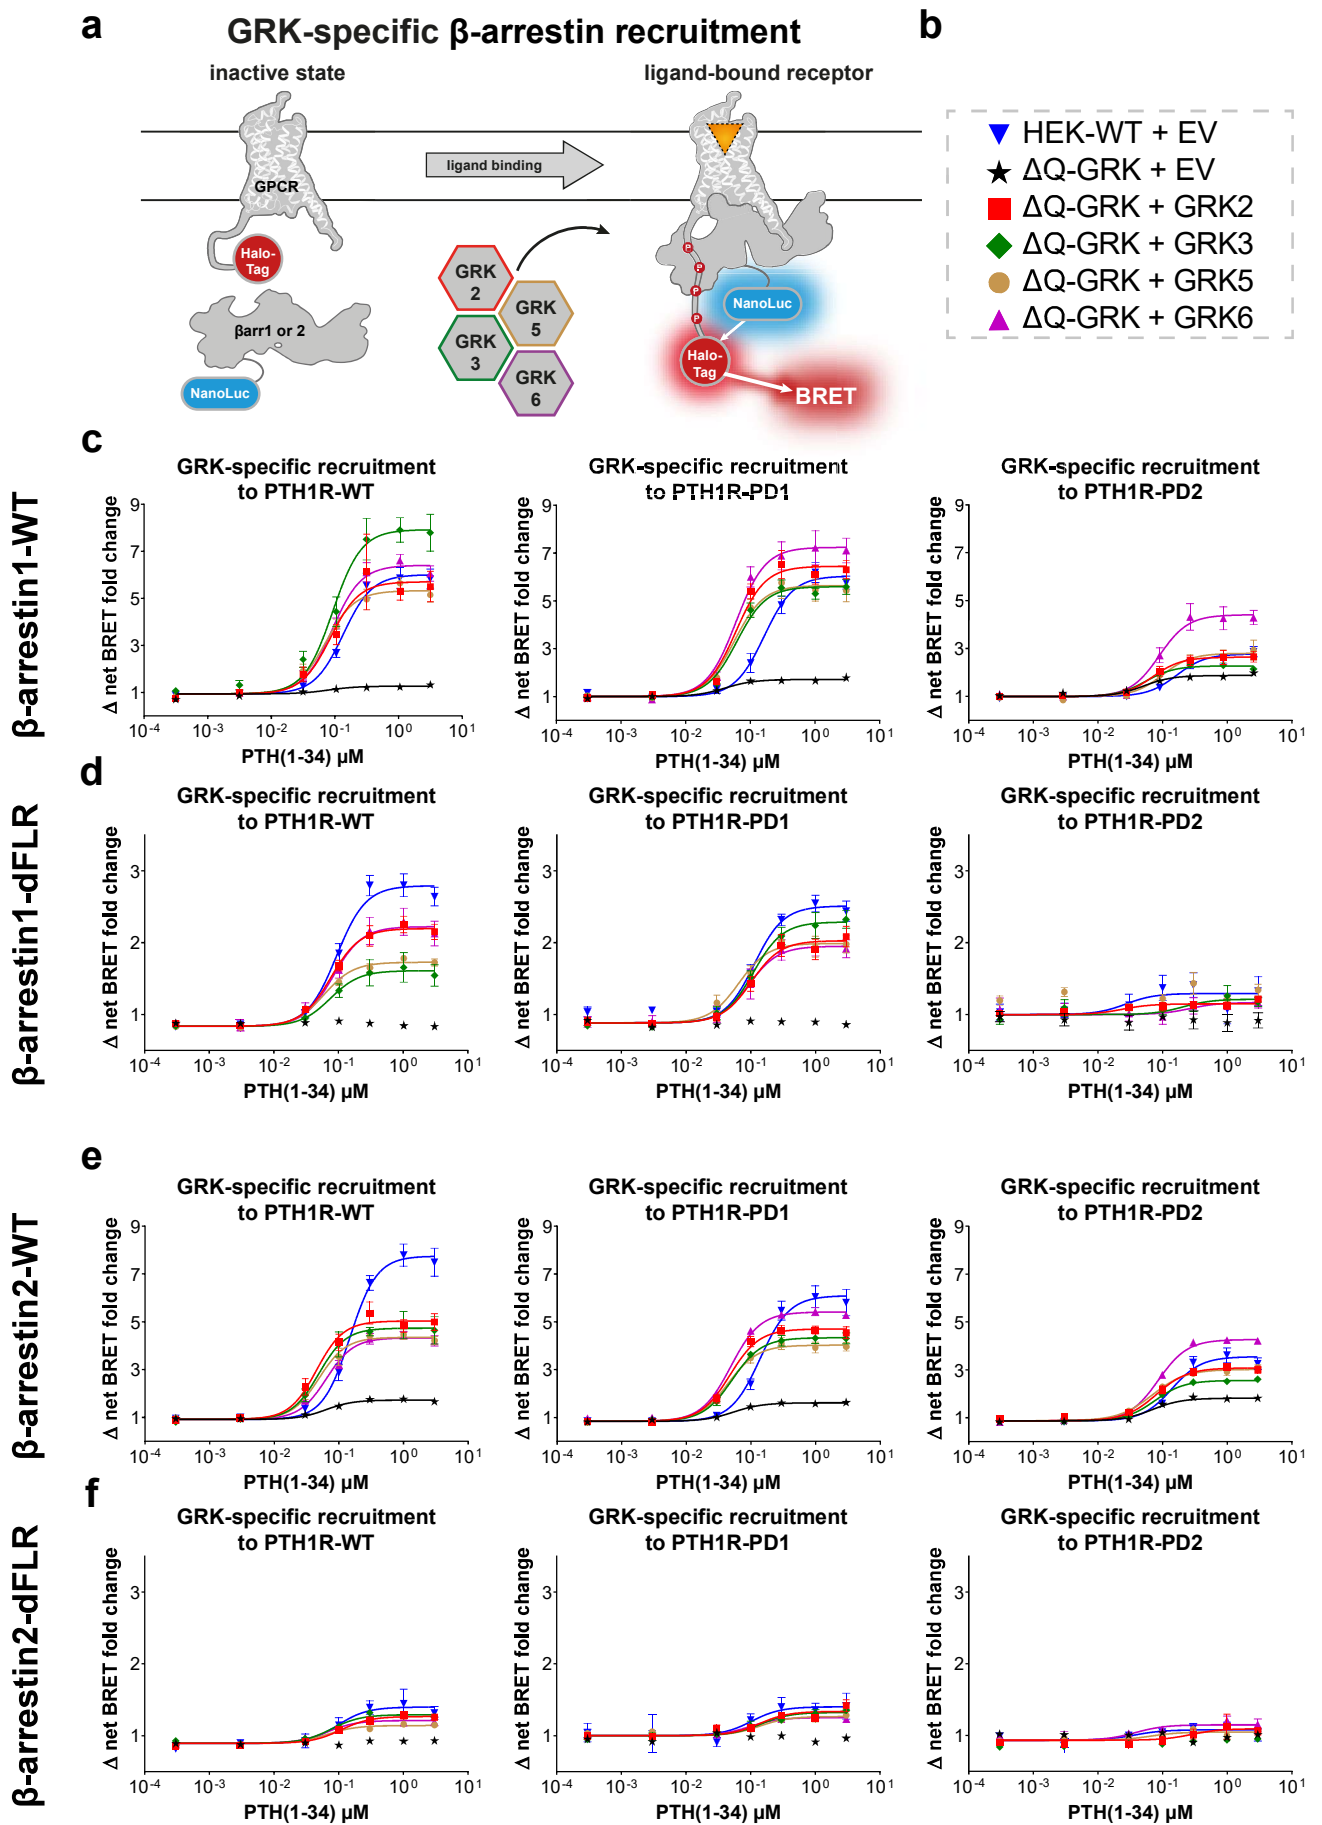

**Supplementary Figure 7:** a Schematic depiction of the utilised GRK-specific NanoBRET  $\beta$ -arrestin recruitment assay. b Colour-coding for GRK-specific conditions used in the performed assay.  $\Delta$ Q-GRK or HEK-WT cells were transfected with C-terminally Halo-tagged PTH1R-WT, -PD1, -PD2 variants and  $\beta$ -arrestin1 (c),  $\beta$ -arrestin1-dFLR (d),  $\beta$ -arrestin2 (e), or  $\beta$ -arrestin2-dFLR (f) -NanoLuc fusion constructs. Additionally, either GRK2, 3, 5, 6, or the empty vector (EV) were co-transfected. The BRET changes are shown as ligand concentration-response curves. All data points are calculated as  $\Delta$  net BRET fold change as the mean of three independent measurements ( $n=3$ )  $\pm$  SEM. Source data is provided as a source data file.

## Supplementary Figure 8

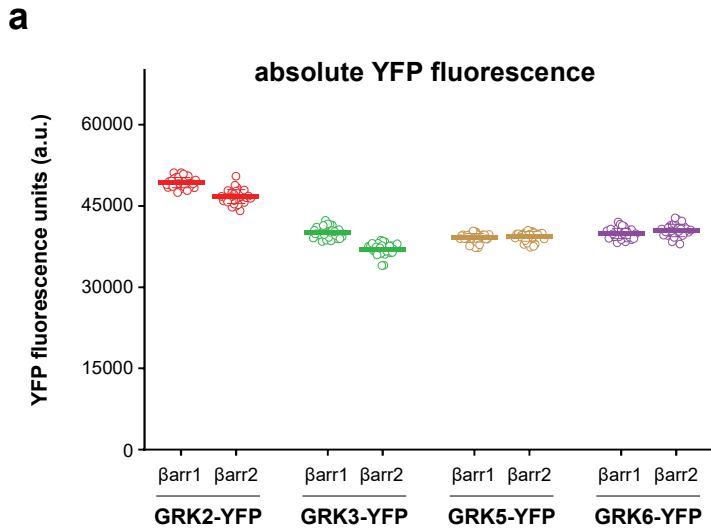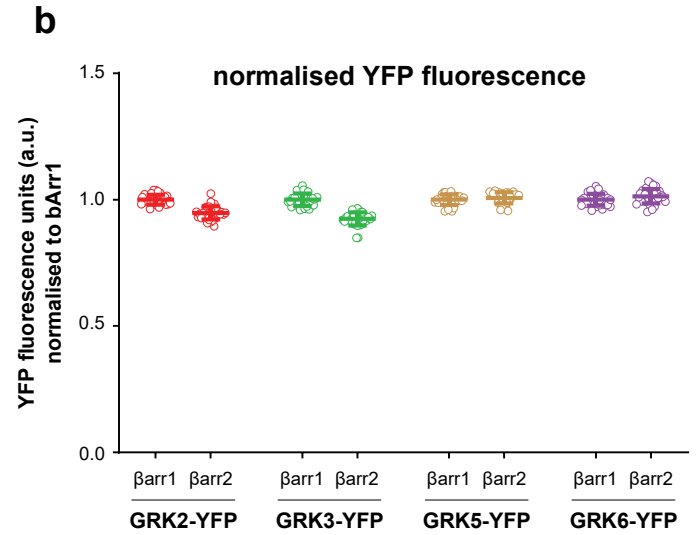

**Supplementary Figure 8:** GRK-YFP fusion proteins were transfected alongside the PTH1R and either  $\beta$ -arrestin1 and 2 in  $\Delta$ Q-GRK (analogous transfection, as performed for experiments shown in Figure 4c-f and Supplementary Figure 7) and YFP fluorescence was measured to confirm similar expression levels of all transfected GRKs between the  $\beta$ -arrestin1 and 2 conditions. Data points represent 24 technical replicates ( $n=1$ ) per transfection, while a depicts the absolute measured YFP fluorescence in arbitrary units (a.u.) and b shows values, which were normalised to the respective  $\beta$ -arrestin1 condition. Additional validation of protein expression levels for the GRK-specific  $\beta$ -arrestin recruitment assay can be found in the original publication<sup>3</sup> and in Reichel *et al.*<sup>4</sup>.

Source data is provided as a source data file.

# Supplementary Figure 9

a

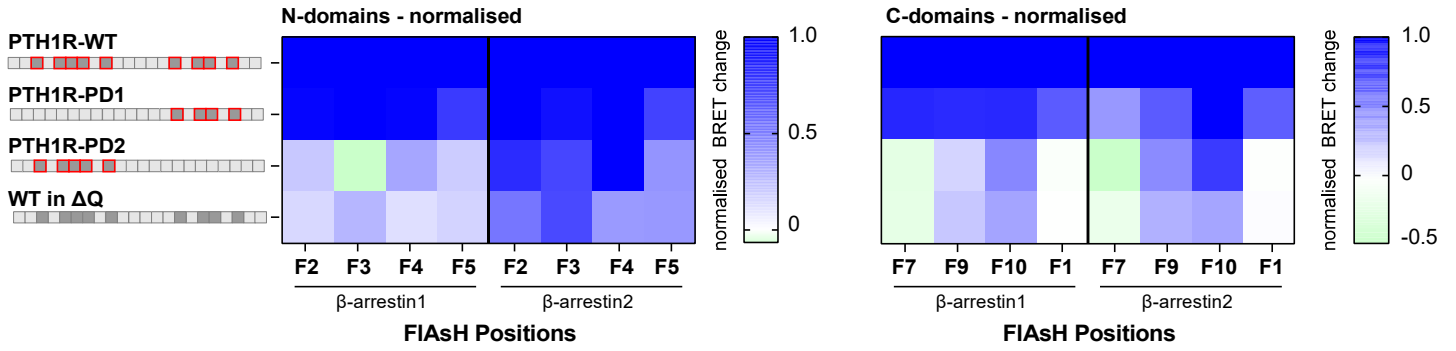

b

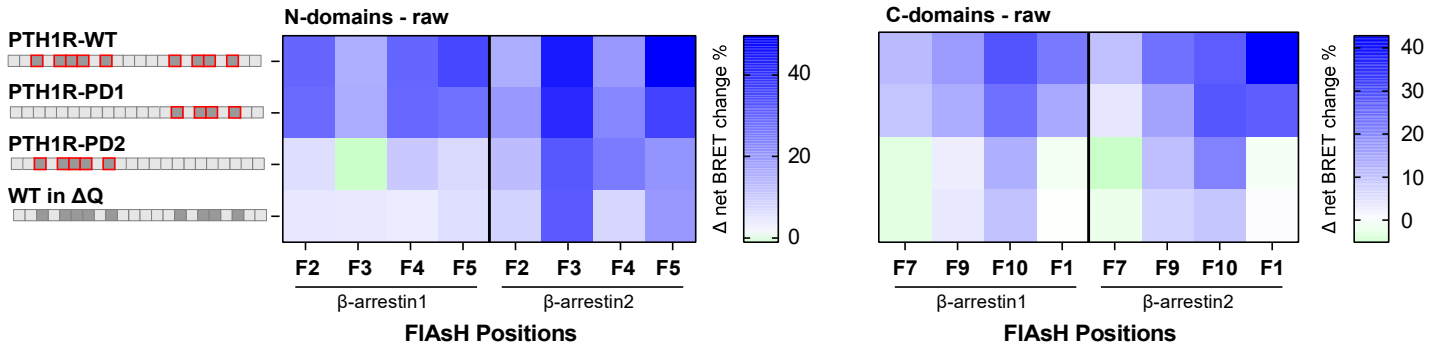

**Supplementary Figure 9:** Heatmap representation of the phosphorylation-specific conformational change measurements for  $\beta$ -arrestin1 and 2 coupling to the PTH1R-WT, PTH1R-PD1, PTH1R-PD2 and the PTH1R-WT in  $\Delta$ Q-GRK, presented in Figure 5. The sensors have again been sorted into the ones that are located in the respective N- (left panels) and C-domains (right panels). a shows the BRET changes after each sensor was normalised to the respective signal induced by the PTH1R-WT. Converted  $\Delta$  net BRET changes in per cent are depicted in b to enable the comparison of the initial fingerprints. Source data is provided as a source data file.

# Supplementary Figure 10

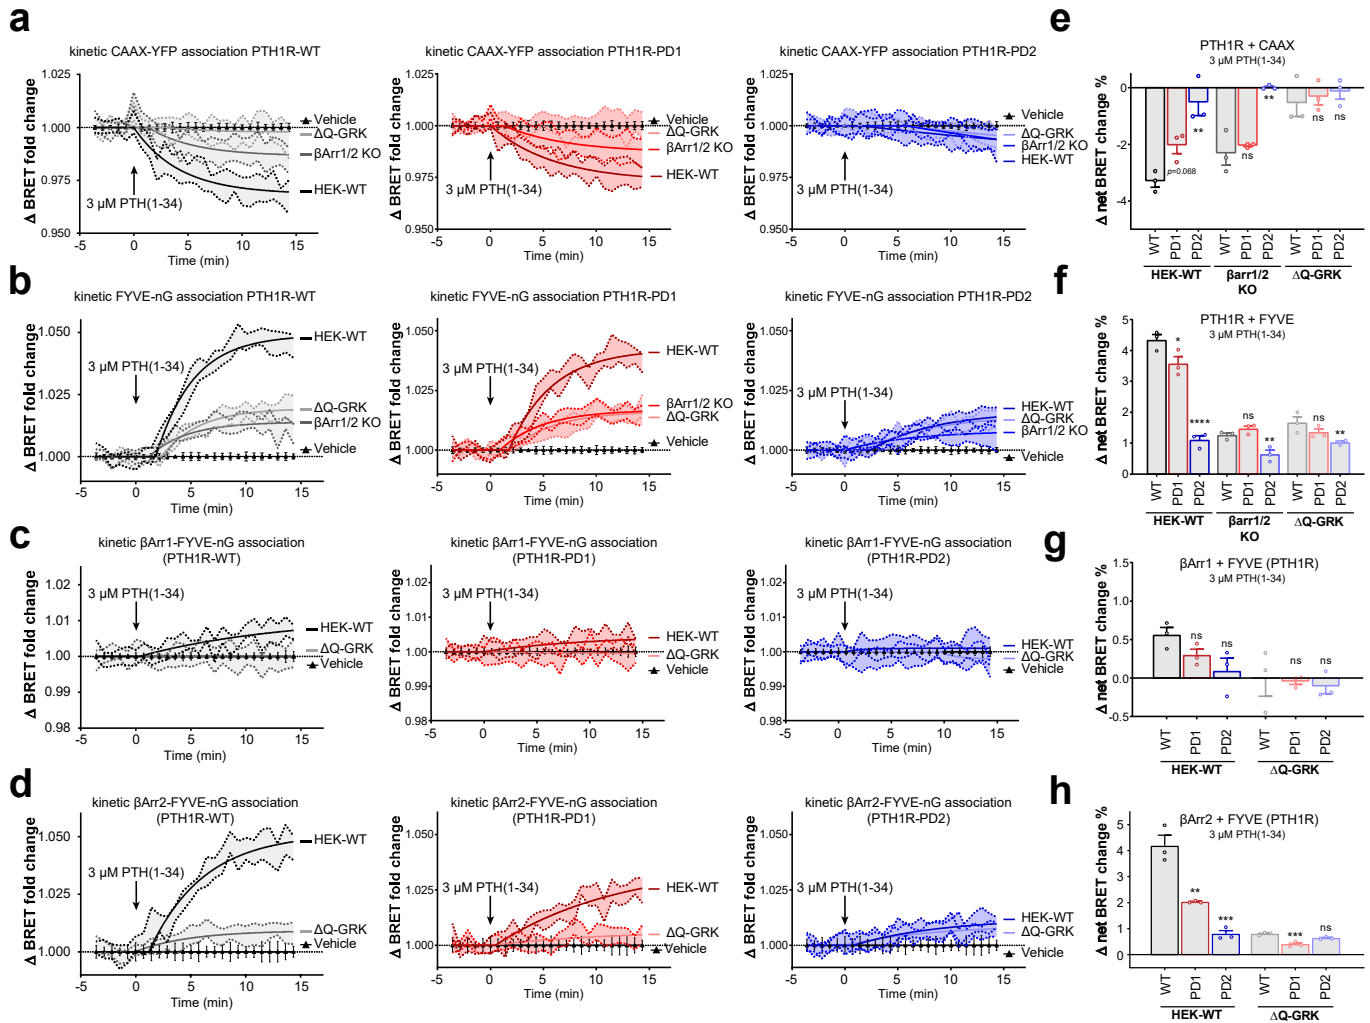

**Supplementary Figure 10:** a, b, c, d Time-dependent analysis of Intermolecular BRET between NanoLuc-tagged PTH1R-WT, -PD1, -PD2, or  $\beta$ -arrestin1 and 2 with CAAX-YFP (a) or FYVE-mNeonGreen (b, c, d), measured in HEK-WT,  $\beta$ -arrestin1/2 knockout cells and  $\Delta$ Q-GRK. The panels correspond to Figure 6c-f and show the kinetic progression of the measurements upon receptor stimulation with 3  $\mu$ M PTH(1-34). Results are shown as mean of three independent repetitions (n=3) and 95% confidence intervals (coloured areas and error bars in the case of vehicle addition). e, f, g, h Data correspond to the BRET changes at 3  $\mu$ M PTH(1-34) from Figure 6c-f. Results are shown as mean of three independent repetitions (n=3)  $\pm$  SEM. To test whether the specific receptor phosphorylation states significantly differ from PTH1R-WT in HEK-WT cells or the probed knockout conditions, a one-way ANOVA and two-sided Dunnett's test was performed (\*,  $p < 0.05$ ; \*\*,  $p < 0.01$ ; \*\*\*,  $p < 0.001$ ; \*\*\*\*,  $p < 0.0001$ ). Exact p-values for conditions with significant differences in comparison to the respective PTH1R-WT measurements were calculated as follows. b: PTH1R-PD2 in HEK-WT  $p = 0.0021$ , PTH1R-PD2 in  $\beta$ arr1/2 KO  $p = 0.0011$ ; d: PTH1R-PD1 in HEK-WT  $p = 0.0487$ , PTH1R-PD2 in HEK-WT  $p < 0.0001$ , PTH1R-PD2 in  $\beta$ arr1/2 KO  $p = 0.009$ , PTH1R-PD2 in  $\Delta$ Q-GRK  $p = 0.0023$ ; h: PTH1R-PD1 in HEK-WT  $p = 0.0014$ , PTH1R-PD2 in HEK-WT  $p = 0.0001$ , PTH1R-PD1 in  $\Delta$ Q-GRK  $p = 0.0009$ . Source data is provided as a source data file.

## Supplementary Figure 11

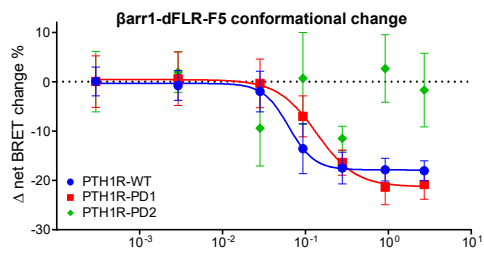

**Supplementary Figure 11:** Concentration-dependent conformational change of  $\beta$ -arrestin1-dFLR, labelled in position F5 upon activation of either the PTH1R-WT, -PD1 or PD2 variants with PTH(1-34). Results are shown as mean of three independent repetitions ( $n=3$ )  $\pm$  SEM. Source data is provided as a source data file.

**Supplementary Table 1:** Results of the statistical analysis of co-localisation between PTH1R-CFP and Rab5-mCherry, as presented in Figure 1f and i. For each indicated condition the co-localisation before stimulation (baseline) and 15 minutes after ligand application (stim) was compared using two-way ANOVA, followed by a post-hoc comparison with Bonferroni correction (\*  $p < 0.05$ ; \*\*  $p < 0.01$ ; \*\*\*  $p < 0.001$ ; \*\*\*\*  $p < 0.0001$ ). Additionally shown are the mean difference and 95% confidence intervals (CI) of the difference.

| conditions                                | mean diff. | 95.00% CI of diff. | p value      |
|-------------------------------------------|------------|--------------------|--------------|
| bArr1_baseline vs. bArr1_stim             | -1.311     | -1.803 to -0.8192  | <0.0001 **** |
| bArr1_baseline vs. bArr1-dFLR_baseline    | 0.000      | -0.5067 to 0.5067  | >0.9999 ns   |
| bArr1_baseline vs. bArr1-dFLR_stim        | -0.952     | -1.441 to -0.4624  | <0.0001 **** |
| bArr1_baseline vs. no bArr_baseline       | 0.000      | -0.6659 to 0.6659  | >0.9999 ns   |
| bArr1_baseline vs. no bArr_stim           | -0.541     | -1.182 to 0.09961  | 0.2289 ns    |
| bArr1_baseline vs. bArr1+dQ_baseline      | 0.000      | -0.5223 to 0.5223  | >0.9999 ns   |
| bArr1_baseline vs. bArr1+dQ_stim          | -0.243     | -0.7614 to 0.2763  | >0.9999 ns   |
| bArr1_stim vs. bArr1-dFLR_baseline        | 1.311      | 0.8321 to 1.79     | <0.0001 **** |
| bArr1_stim vs. bArr1-dFLR_stim            | 0.359      | -0.1016 to 0.8196  | 0.4081 ns    |
| bArr1_stim vs. no bArr_baseline           | 1.311      | 0.6659 to 1.956    | <0.0001 **** |
| bArr1_stim vs. no bArr_stim               | 0.769      | 0.1502 to 1.389    | 0.0031 **    |
| bArr1_stim vs. bArr1+dQ_baseline          | 1.311      | 0.8156 to 1.806    | <0.0001 **** |
| bArr1_stim vs. bArr1+dQ_stim              | 1.068      | 0.5766 to 1.56     | <0.0001 **** |
| bArr1-dFLR_baseline vs. bArr1-dFLR_stim   | -0.952     | -1.428 to -0.4753  | <0.0001 **** |
| bArr1-dFLR_baseline vs. no bArr_baseline  | 0.000      | -0.6564 to 0.6564  | >0.9999 ns   |
| bArr1-dFLR_baseline vs. no bArr_stim      | -0.541     | -1.173 to 0.08977  | 0.2028 ns    |
| bArr1-dFLR_baseline vs. bArr1+dQ_baseline | 0.000      | -0.5101 to 0.5101  | >0.9999 ns   |
| bArr1-dFLR_baseline vs. bArr1+dQ_stim     | -0.243     | -0.7492 to 0.2641  | >0.9999 ns   |
| bArr1-dFLR_stim vs. no bArr_baseline      | 0.952      | 0.3086 to 1.595    | 0.0001 ***   |
| bArr1-dFLR_stim vs. no bArr_stim          | 0.411      | -0.207 to 1.028    | >0.9999 ns   |
| bArr1-dFLR_stim vs. bArr1+dQ_baseline     | 0.952      | 0.4588 to 1.445    | <0.0001 **** |
| bArr1-dFLR_stim vs. bArr1+dQ_stim         | 0.709      | 0.2198 to 1.199    | 0.0002 ***   |
| no bArr_baseline vs. no bArr_stim         | -0.541     | -1.306 to 0.2235   | 0.739 ns     |
| no bArr_baseline vs. bArr1+dQ_baseline    | 0.000      | -0.6686 to 0.6686  | >0.9999 ns   |
| no bArr_baseline vs. bArr1+dQ_stim        | -0.243     | -0.9084 to 0.4234  | >0.9999 ns   |
| no bArr_stim vs. bArr1+dQ_baseline        | 0.541      | -0.1024 to 1.185   | 0.2366 ns    |
| no bArr_stim vs. bArr1+dQ_stim            | 0.299      | -0.3422 to 0.9399  | >0.9999 ns   |
| bArr1+dQ_baseline vs. bArr1+dQ_stim       | -0.243     | -0.7648 to 0.2797  | >0.9999 ns   |
|                                           |            |                    |              |
| bArr2_baseline vs. bArr2_stim             | -1.211     | -1.709 to -0.7121  | <0.0001 **** |
| bArr2_baseline vs. bArr2-dFLR_baseline    | -3.03E-10  | -0.5334 to 0.5334  | >0.9999 ns   |
| bArr2_baseline vs. bArr2-dFLR_stim        | -0.5697    | -1.068 to -0.07097 | 0.0104 *     |
| bArr2_baseline vs. no bArr_baseline       | -3.03E-10  | -0.6136 to 0.6136  | >0.9999 ns   |
| bArr2_baseline vs. bArr1_stim             | -0.5414    | -1.133 to 0.05048  | 0.118 ns     |
| bArr2_baseline vs. bArr2+dQ_baseline      | -3.03E-10  | -0.461 to 0.461    | >0.9999 ns   |
| bArr2_baseline vs. bArr2+dQ_stim          | -0.1502    | -0.6028 to 0.3023  | >0.9999 ns   |
| bArr2_stim vs. bArr2-dFLR_baseline        | 1.211      | 0.6843 to 1.737    | <0.0001 **** |
| bArr2_stim vs. bArr2-dFLR_stim            | 0.6411     | 0.1498 to 1.132    | 0.0014 **    |
| bArr2_stim vs. no bArr_baseline           | 1.211      | 0.6032 to 1.818    | <0.0001 **** |
| bArr2_stim vs. bArr1_stim                 | 0.6694     | 0.08369 to 1.255   | 0.0104 *     |
| bArr2_stim vs. bArr2+dQ_baseline          | 1.211      | 0.7578 to 1.664    | <0.0001 **** |
| bArr2_stim vs. bArr2+dQ_stim              | 1.061      | 0.6161 to 1.505    | <0.0001 **** |
| bArr2-dFLR_baseline vs. bArr2-dFLR_stim   | -0.5697    | -1.096 to -0.04322 | 0.0207 *     |
| bArr2-dFLR_baseline vs. no bArr_baseline  | 0          | -0.6363 to 0.6363  | >0.9999 ns   |
| bArr2-dFLR_baseline vs. bArr1_stim        | -0.5414    | -1.157 to 0.07404  | 0.165 ns     |
| bArr2-dFLR_baseline vs. bArr2+dQ_baseline | 0          | -0.4909 to 0.4909  | >0.9999 ns   |
| bArr2-dFLR_baseline vs. bArr2+dQ_stim     | -0.1502    | -0.6332 to 0.3327  | >0.9999 ns   |
| bArr2-dFLR_stim vs. no bArr_baseline      | 0.5697     | -0.03793 to 1.177  | 0.0943 ns    |
| bArr2-dFLR_stim vs. bArr1_stim            | 0.02825    | -0.5574 to 0.6139  | >0.9999 ns   |
| bArr2-dFLR_stim vs. bArr2+dQ_baseline     | 0.5697     | 0.1167 to 1.023    | 0.0026 **    |
| bArr2-dFLR_stim vs. bArr2+dQ_stim         | 0.4194     | -0.02498 to 0.8638 | 0.0887 ns    |
| no bArr_baseline vs. bArr1_stim           | -0.5414    | -1.228 to 0.1447   | 0.3747 ns    |
| no bArr_baseline vs. bArr2+dQ_baseline    | 0          | -0.577 to 0.577    | >0.9999 ns   |
| no bArr_baseline vs. bArr2+dQ_stim        | -0.1502    | -0.7206 to 0.4201  | >0.9999 ns   |
| bArr1_stim vs. bArr2+dQ_baseline          | 0.5414     | -0.01249 to 1.095  | 0.0631 ns    |
| bArr1_stim vs. bArr2+dQ_stim              | 0.3912     | -0.1558 to 0.9381  | 0.6948 ns    |
| bArr2+dQ_baseline vs. bArr2+dQ_stim       | -0.1502    | -0.5519 to 0.2514  | >0.9999 ns   |



**Supplementary Table 2:** EC<sub>50</sub> values and standard errors derived from conformational change measurements of individual  $\beta$ -arrestin1 FIAsh biosensors upon stimulation of the respective PTH1R phosphorylation-specific receptor state with PTH(1-34) in  $\mu$ M.

| $\beta$ -arrestin1 | PTH1R-WT          | PTH1R-PD1         | PTH1R-PD2         | PTH1R in $\Delta$ Q-GRK |
|--------------------|-------------------|-------------------|-------------------|-------------------------|
| <b>F1</b>          | 0.126 $\pm$ 0.015 | 0.217 $\pm$ 0.039 | N/A               | N/A                     |
| <b>F2</b>          | 0.115 $\pm$ 0.006 | 0.149 $\pm$ 0.010 | 0.159 $\pm$ 0.048 | 0.270 $\pm$ 0.160       |
| <b>F3</b>          | 0.107 $\pm$ 0.030 | 0.088 $\pm$ 0.018 | 0.146 $\pm$ 0.080 | N/A                     |
| <b>F4</b>          | 0.120 $\pm$ 0.010 | 0.117 $\pm$ 0.010 | 0.184 $\pm$ 0.052 | 0.356 $\pm$ 0.187       |
| <b>F5</b>          | 0.140 $\pm$ 0.009 | 0.179 $\pm$ 0.011 | 0.188 $\pm$ 0.037 | 0.034 $\pm$ 0.019       |
| <b>F7</b>          | 0.157 $\pm$ 0.032 | 0.168 $\pm$ 0.074 | 0.473 $\pm$ 0.324 | N/A                     |
| <b>F9</b>          | 0.123 $\pm$ 0.025 | 0.124 $\pm$ 0.030 | 0.125 $\pm$ 0.058 | N/A                     |
| <b>F10</b>         | 0.110 $\pm$ 0.037 | 0.122 $\pm$ 0.017 | 0.141 $\pm$ 0.073 | 0.076 $\pm$ 0.046       |

**Supplementary Table 3:** EC<sub>50</sub> values and standard errors derived from conformational change measurements of individual  $\beta$ -arrestin2 FIAsh biosensors upon stimulation of the respective PTH1R phosphorylation-specific receptor state with PTH(1-34) in  $\mu$ M.

| $\beta$ -arrestin2 | PTH1R-WT          | PTH1R-PD1         | PTH1R-PD2         | PTH1R in $\Delta$ Q-GRK |
|--------------------|-------------------|-------------------|-------------------|-------------------------|
| <b>F1</b>          | 0.160 $\pm$ 0.025 | 0.202 $\pm$ 0.024 | N/A               | N/A                     |
| <b>F2</b>          | 0.088 $\pm$ 0.019 | 0.140 $\pm$ 0.028 | 0.172 $\pm$ 0.061 | 0.096 $\pm$ 0.017       |
| <b>F3</b>          | 0.125 $\pm$ 0.010 | 0.119 $\pm$ 0.012 | 0.136 $\pm$ 0.025 | 0.122 $\pm$ 0.008       |
| <b>F4</b>          | 0.119 $\pm$ 0.042 | 0.162 $\pm$ 0.057 | 0.230 $\pm$ 0.330 | 0.098 $\pm$ 0.022       |
| <b>F5</b>          | 0.144 $\pm$ 0.011 | 0.149 $\pm$ 0.011 | 0.175 $\pm$ 0.023 | 0.093 $\pm$ 0.022       |
| <b>F7</b>          | 0.126 $\pm$ 0.071 | 0.092 $\pm$ 0.066 | N/A               | N/A                     |
| <b>F9</b>          | 0.112 $\pm$ 0.057 | 0.266 $\pm$ 0.127 | N/A               | N/A                     |
| <b>F10</b>         | 0.112 $\pm$ 0.026 | 0.104 $\pm$ 0.011 | N/A               | N/A                     |

**Supplementary Table 4:** Results of the statistical analysis of conformational change measurement presented. For each indicated condition the BRET ratio after ligand application in the highest concentration was compared to the recorded BRET ratio after vehicle stimulation using two-sided Student's t-test (\*  $p < 0.05$ ; \*\*  $p < 0.01$ ; \*\*\*  $p < 0.001$ ). Additionally shown are the effect size, lower and upper confidence intervals (CI), t-statistic and degrees of freedom (df).

| condition                | sensor | effect size | lower 95% CI | upper 95% CI | t statistic | df    | p value    |
|--------------------------|--------|-------------|--------------|--------------|-------------|-------|------------|
| PTH1R- $\beta$ Arr1      | F1     | -6.084      | -0.302       | -0.138       | -7.451      | 3.997 | 0.0017 **  |
| PTH1R- $\beta$ Arr1      | F2     | -2.374      | -0.704       | 0.135        | -2.908      | 2.004 | 0.1005     |
| PTH1R- $\beta$ Arr1      | F3     | -8.036      | -0.197       | -0.109       | -9.842      | 3.875 | 0.0007 *** |
| PTH1R- $\beta$ Arr1      | F4     | -9.483      | -0.431       | -0.202       | -11.614     | 2.048 | 0.0067 **  |
| PTH1R- $\beta$ Arr1      | F5     | -8.521      | -0.487       | -0.208       | -10.435     | 2.060 | 0.0082 **  |
| PTH1R- $\beta$ Arr1      | F7     | -2.837      | -0.220       | -0.019       | -3.474      | 3.558 | 0.0307 *   |
| PTH1R- $\beta$ Arr1      | F9     | -3.796      | -0.255       | -0.084       | -5.368      | 4.247 | 0.0049 **  |
| PTH1R- $\beta$ Arr1      | F10    | -2.243      | -0.470       | 0.051        | -2.747      | 2.675 | 0.0806     |
| PTH1R- $\beta$ Arr2      | F1     | -3.931      | -0.718       | -0.075       | -4.854      | 2.211 | 0.0326 *   |
| PTH1R- $\beta$ Arr2      | F2     | -2.575      | -0.339       | 0.040        | -3.174      | 2.154 | 0.0786     |
| PTH1R- $\beta$ Arr2      | F3     | -13.647     | -0.489       | -0.379       | -19.299     | 5.984 | 0.0000 *** |
| PTH1R- $\beta$ Arr2      | F4     | -1.846      | -0.270       | 0.041        | -2.261      | 3.187 | 0.1036     |
| PTH1R- $\beta$ Arr2      | F5     | -8.665      | -0.658       | -0.284       | -10.632     | 2.045 | 0.0081 **  |
| PTH1R- $\beta$ Arr2      | F7     | -1.994      | -0.242       | 0.018        | -2.442      | 3.834 | 0.0738     |
| PTH1R- $\beta$ Arr2      | F9     | -1.913      | -0.467       | 0.097        | -2.342      | 2.502 | 0.1183     |
| PTH1R- $\beta$ Arr2      | F10    | -2.457      | -0.430       | -0.072       | -3.475      | 5.702 | 0.0144 *   |
| $\Delta$ Q- $\beta$ Arr1 | F1     | 0.840       | -0.078       | 0.194        | 1.188       | 4.002 | 0.3007     |
| $\Delta$ Q- $\beta$ Arr1 | F2     | -0.926      | -0.131       | 0.040        | -1.310      | 6.000 | 0.2382     |
| $\Delta$ Q- $\beta$ Arr1 | F3     | 0.183       | -0.319       | 0.394        | 0.258       | 5.995 | 0.8049     |
| $\Delta$ Q- $\beta$ Arr1 | F4     | -0.491      | -0.188       | 0.112        | -0.694      | 4.124 | 0.5246     |
| $\Delta$ Q- $\beta$ Arr1 | F5     | -1.317      | -0.140       | 0.020        | -1.862      | 5.731 | 0.1142     |
| $\Delta$ Q- $\beta$ Arr1 | F7     | -0.317      | -0.317       | 0.219        | -0.449      | 5.888 | 0.6697     |
| $\Delta$ Q- $\beta$ Arr1 | F9     | 0.637       | -0.072       | 0.142        | 0.901       | 4.160 | 0.4166     |
| $\Delta$ Q- $\beta$ Arr1 | F10    | -0.560      | -0.341       | 0.176        | -0.792      | 5.723 | 0.4599     |
| $\Delta$ Q- $\beta$ Arr2 | F1     | -0.021      | -0.192       | 0.188        | -0.030      | 5.521 | 0.9770     |
| $\Delta$ Q- $\beta$ Arr2 | F2     | -1.026      | -0.378       | 0.117        | -1.451      | 4.100 | 0.2186     |
| $\Delta$ Q- $\beta$ Arr2 | F3     | -2.159      | -0.629       | 0.010        | -3.053      | 3.054 | 0.0540     |
| $\Delta$ Q- $\beta$ Arr2 | F4     | -0.064      | -0.379       | 0.358        | -0.090      | 3.182 | 0.9335     |
| $\Delta$ Q- $\beta$ Arr2 | F5     | -3.739      | -0.296       | -0.108       | -5.288      | 5.909 | 0.0019 **  |
| $\Delta$ Q- $\beta$ Arr2 | F7     | 0.305       | -0.186       | 0.260        | 0.432       | 4.732 | 0.6848     |
| $\Delta$ Q- $\beta$ Arr2 | F9     | -0.707      | -0.631       | 0.265        | -1.000      | 5.964 | 0.3561     |
| $\Delta$ Q- $\beta$ Arr2 | F10    | -0.937      | -0.460       | 0.152        | -1.325      | 4.631 | 0.2469     |
| PD1- $\beta$ Arr1        | F1     | -3.379      | -0.249       | -0.040       | -4.139      | 3.350 | 0.0206 *   |
| PD1- $\beta$ Arr1        | F2     | -11.221     | -0.351       | -0.223       | -13.743     | 3.224 | 0.0006 *** |
| PD1- $\beta$ Arr1        | F3     | -1.626      | -0.429       | 0.140        | -1.991      | 2.224 | 0.1717     |
| PD1- $\beta$ Arr1        | F4     | -6.730      | -0.456       | -0.176       | -8.242      | 2.422 | 0.0079 **  |
| PD1- $\beta$ Arr1        | F5     | -12.182     | -0.337       | -0.196       | -14.920     | 2.211 | 0.0029 **  |
| PD1- $\beta$ Arr1        | F7     | -1.769      | -0.254       | 0.061        | -2.166      | 2.539 | 0.1351     |
| PD1- $\beta$ Arr1        | F9     | -2.395      | -0.215       | -0.034       | -3.387      | 5.920 | 0.0150 *   |
| PD1- $\beta$ Arr1        | F10    | -4.763      | -0.356       | -0.126       | -5.834      | 3.994 | 0.0043 **  |
| PD1- $\beta$ Arr2        | F1     | -2.894      | -0.431       | -0.055       | -3.721      | 3.683 | 0.0237 *   |
| PD1- $\beta$ Arr2        | F2     | -2.309      | -0.487       | 0.062        | -2.868      | 2.379 | 0.0844     |
| PD1- $\beta$ Arr2        | F3     | -12.776     | -0.472       | -0.355       | -18.068     | 5.075 | 0.0000 *** |
| PD1- $\beta$ Arr2        | F4     | -3.758      | -0.456       | -0.044       | -4.602      | 2.317 | 0.0331 *   |
| PD1- $\beta$ Arr2        | F5     | -6.617      | -0.514       | -0.179       | -8.169      | 2.204 | 0.0109 *   |
| PD1- $\beta$ Arr2        | F7     | -2.073      | -0.097       | 0.004        | -2.539      | 3.974 | 0.0644     |
| PD1- $\beta$ Arr2        | F9     | -1.653      | -0.402       | 0.113        | -2.024      | 2.458 | 0.1559     |
| PD1- $\beta$ Arr2        | F10    | -3.782      | -0.403       | -0.145       | -5.348      | 5.378 | 0.0025 **  |
| PD2- $\beta$ Arr1        | F1     | 0.462       | -0.044       | 0.066        | 0.566       | 3.998 | 0.6016     |
| PD2- $\beta$ Arr1        | F2     | -2.526      | -0.123       | -0.002       | -3.094      | 3.372 | 0.0458 *   |
| PD2- $\beta$ Arr1        | F3     | 0.388       | -0.046       | 0.065        | 0.475       | 3.957 | 0.6599     |
| PD2- $\beta$ Arr1        | F4     | -4.179      | -0.166       | -0.047       | -5.119      | 3.729 | 0.0083 **  |
| PD2- $\beta$ Arr1        | F5     | -4.672      | -0.101       | -0.034       | -5.722      | 3.860 | 0.0051 **  |
| PD2- $\beta$ Arr1        | F7     | 0.915       | -0.044       | 0.103        | 1.121       | 4.000 | 0.3250     |
| PD2- $\beta$ Arr1        | F9     | -0.509      | -0.136       | 0.079        | -0.719      | 4.158 | 0.5104     |
| PD2- $\beta$ Arr1        | F10    | -0.991      | -0.578       | 0.315        | -1.214      | 2.096 | 0.3437     |
| PD2- $\beta$ Arr2        | F1     | 0.067       | -0.105       | 0.112        | 0.087       | 3.791 | 0.9353     |
| PD2- $\beta$ Arr2        | F2     | -1.476      | -0.321       | 0.098        | -1.847      | 2.603 | 0.1758     |
| PD2- $\beta$ Arr2        | F3     | -3.869      | -0.482       | -0.123       | -4.738      | 3.881 | 0.0097 **  |
| PD2- $\beta$ Arr2        | F4     | -2.373      | -0.602       | -0.009       | -2.906      | 3.858 | 0.0458 *   |
| PD2- $\beta$ Arr2        | F5     | -7.528      | -0.258       | -0.151       | -9.959      | 4.801 | 0.0002 *** |
| PD2- $\beta$ Arr2        | F7     | 2.330       | 0.001        | 0.102        | 2.853       | 3.882 | 0.0479 *   |
| PD2- $\beta$ Arr2        | F9     | -1.055      | -0.303       | 0.111        | -1.292      | 3.948 | 0.2666     |
| PD2- $\beta$ Arr2        | F10    | -1.170      | -0.424       | 0.088        | -1.655      | 5.351 | 0.1551     |

**Supplementary Table 5:** Results of the statistical analysis of conformational change measurement presented in Figure 5. For each indicated phosphorylation-specific condition the BRET ratio after ligand application in the highest concentration was compared to measurements using the PTH1R-WT receptor. The statistical significance was calculated by one-way ANOVA, followed by a two-sided Dunnett's test (\*, p<0.05; \*\*, p<0.001; \*\*\*, p<0.0001; \*\*\*\*, p<0.00001). Additionally shown are the mean difference and 95% confidence intervals (CI) of the difference.

| biosensor        | multiple comparison | Mean difference | 95% CI of difference | Adjusted p-value |
|------------------|---------------------|-----------------|----------------------|------------------|
| <b>βArr1-F1</b>  | WT vs. PD1          | -8,041          | -18,22 to 2,134      | 0,1251 ns        |
|                  | WT vs. PD2          | -23,64          | -33,82 to -13,47     | 0,0003 ***       |
|                  | WT vs. WT in dQ     | -22,7           | -32,21 to -13,18     | 0,0003 ***       |
| <b>βArr1-F2</b>  | WT vs. PD1          | -0,6617         | -19,27 to 17,94      | 0,9992 ns        |
|                  | WT vs. PD2          | -23,34          | -41,94 to -4,731     | 0,0165 *         |
|                  | WT vs. WT in dQ     | -25,13          | -42,53 to -7,723     | 0,0074 **        |
| <b>βArr1-F3</b>  | WT vs. PD1          | 0,5558          | -10,47 to 11,58      | 0,9977 ns        |
|                  | WT vs. PD2          | -16,53          | -27,56 to -5,507     | 0,0059 **        |
|                  | WT vs. WT in dQ     | -11,09          | -21,41 to -0,7798    | 0,0359 *         |
| <b>βArr1-F4</b>  | WT vs. PD1          | -0,4785         | -14,37 to 13,41      | 0,9993 ns        |
|                  | WT vs. PD2          | -19,51          | -33,40 to -5,620     | 0,0087 **        |
|                  | WT vs. WT in dQ     | -26,19          | -39,18 to -13,20     | 0,0008 ***       |
| <b>βArr1-F5</b>  | WT vs. PD1          | -8,242          | -17,50 to 1,012      | 0,0809 ns        |
|                  | WT vs. PD2          | -28,69          | -37,94 to -19,43     | <0,0001 ****     |
|                  | WT vs. WT in dQ     | -29,63          | -38,29 to -20,97     | <0,0001 ****     |
| <b>βArr1-F7</b>  | WT vs. PD1          | -1,757          | -16,66 to 13,15      | 0,974 ns         |
|                  | WT vs. PD2          | -14,47          | -29,37 to 0,4370     | 0,0569 ns        |
|                  | WT vs. WT in dQ     | -14,25          | -28,19 to -0,3113    | 0,0453 *         |
| <b>βArr1-F9</b>  | WT vs. PD1          | -2,798          | -16,98 to 11,38      | 0,9114 ns        |
|                  | WT vs. PD2          | -13,93          | -28,10 to 0,2530     | 0,0544 ns        |
|                  | WT vs. WT in dQ     | -13,04          | -27,22 to 1,136      | 0,073 ns         |
| <b>βArr1-F10</b> | WT vs. PD1          | -4,542          | -22,41 to 13,32      | 0,8148 ns        |
|                  | WT vs. PD2          | -15,2           | -33,07 to 2,664      | 0,0963 ns        |
|                  | WT vs. WT in dQ     | -18,48          | -35,19 to -1,764     | 0,0314 *         |
| <b>βArr2-F1</b>  | WT vs. PD1          | -15,94          | -33,30 to 1,408      | 0,0715 ns        |
|                  | WT vs. PD2          | -43,86          | -61,21 to -26,51     | 0,0002 ***       |
|                  | WT vs. WT in dQ     | -42,49          | -58,72 to -26,26     | 0,0001 ***       |
| <b>βArr2-F2</b>  | WT vs. PD1          | 4,418           | -12,59 to 21,43      | 0,8058 ns        |
|                  | WT vs. PD2          | -2,666          | -19,67 to 14,34      | 0,9434 ns        |
|                  | WT vs. WT in dQ     | -7,236          | -23,15 to 8,673      | 0,4694 ns        |
| <b>βArr2-F3</b>  | WT vs. PD1          | -2,961          | -18,95 to 13,03      | 0,9237 ns        |
|                  | WT vs. PD2          | -12,31          | -29,58 to 4,962      | 0,1835 ns        |
|                  | WT vs. WT in dQ     | -12,82          | -28,81 to 3,171      | 0,1243 ns        |
| <b>βArr2-F4</b>  | WT vs. PD1          | 3,522           | -14,83 to 21,88      | 0,9047 ns        |
|                  | WT vs. PD2          | 5,813           | -12,54 to 24,17      | 0,708 ns         |
|                  | WT vs. WT in dQ     | -12,02          | -29,19 to 5,152      | 0,1835 ns        |
| <b>βArr2-F5</b>  | WT vs. PD1          | -12,94          | -24,32 to -1,565     | 0,0273 *         |
|                  | WT vs. PD2          | -28,87          | -40,24 to -17,49     | 0,0002 ***       |
|                  | WT vs. WT in dQ     | -29,65          | -40,30 to -19,01     | <0,0001 ****     |
| <b>βArr2-F7</b>  | WT vs. PD1          | -6,231          | -15,18 to 2,716      | 0,1862 ns        |
|                  | WT vs. PD2          | -15,55          | -24,49 to -6,600     | 0,0023 **        |
|                  | WT vs. WT in dQ     | -12,44          | -20,81 to -4,070     | 0,0062 **        |
| <b>βArr2-F9</b>  | WT vs. PD1          | -8,531          | -27,53 to 10,47      | 0,4786 ns        |
|                  | WT vs. PD2          | -12,98          | -31,98 to 6,021      | 0,1968 ns        |
|                  | WT vs. WT in dQ     | -16,48          | -34,25 to 1,297      | 0,0689 ns        |
| <b>βArr2-F10</b> | WT vs. PD1          | 1,087           | -12,78 to 14,95      | 0,9932 ns        |
|                  | WT vs. PD2          | -6,252          | -20,12 to 7,613      | 0,5048 ns        |
|                  | WT vs. WT in dQ     | -17,6           | -31,47 to -3,740     | 0,0136 *         |

## Supplementary References

- 1 Shukla, A. K. et al. Structure of active beta-arrestin-1 bound to a G-protein-coupled receptor phosphopeptide. *Nature* 497, 137-141, doi:10.1038/nature12120 (2013).
- 2 Min, K. et al. Crystal Structure of beta-Arrestin 2 in Complex with CXCR7 Phosphopeptide. *Structure*, doi:10.1016/j.str.2020.06.002 (2020).
- 3 Drube, J. et al. GPCR kinase knockout cells reveal the impact of individual GRKs on arrestin binding and GPCR regulation. *Nat Commun* 13, 540, doi:10.1038/s41467-022-28152-8 (2022).
- 4 Reichel, M., Weitzel, V., Klement, L., Hoffmann, C. & Drube, J. Suitability of GRK Antibodies for Individual Detection and Quantification of GRK Isoforms in Western Blots. *Int J Mol Sci* 23, doi:10.3390/ijms23031195 (2022).
